# Supplementary material
Source: PubMed Central journal article supplement (PMC3815516)
Supplement: NIHMS480482-supplement-06.pdf [file NIHMS480482-supplement-06.pdf]

|                  | Trait | RS Controls |              |              |         | JS Controls |              |              |         | RS+JS Controls |              |              |
|------------------|-------|-------------|--------------|--------------|---------|-------------|--------------|--------------|---------|----------------|--------------|--------------|
|                  |       | N           | Beta (SE)    | 95% CI       | P-value | N           | Beta (SE)    | 95% CI       | P-value | N              | Beta (SE)    | 95% CI       |
| CR1 rs6656401    | LMIR  | 1,654       | 0.12 (0.29)  | -0.44 - 0.69 | 0.669   | 506         | 0.94 (0.58)  | -0.21 - 2.09 | 0.109   | 2,160          | 0.35 (0.27)  | -0.17 - 0.87 |
|                  | LMDR  | 1,654       | 0.27 (0.32)  | -0.37 - 0.9  | 0.411   | 505         | 1.12 (0.66)  | -0.18 - 2.42 | 0.092   | 2,159          | 0.51 (0.31)  | -0.09 - 1.11 |
|                  | LMPR  | 1,654       | 0.58 (0.8)   | -0.99 - 2.15 | 0.470   | 505         | 0.57 (1.03)  | -1.45 - 2.59 | 0.582   | 2,159          | 0.6 (0.67)   | -0.72 - 1.92 |
|                  | VRIR  | 1,610       | 0.31 (0.26)  | -0.19 - 0.81 | 0.230   | 505         | -0.59 (0.41) | -1.4 - 0.23  | 0.159   | 2,115          | 0.09 (0.22)  | -0.34 - 0.51 |
|                  | VRDR  | 1,609       | 0.3 (0.36)   | -0.4 - 1     | 0.404   | 505         | -0.42 (0.6)  | -1.6 - 0.76  | 0.483   | 2,114          | 0.11 (0.31)  | -0.49 - 0.72 |
|                  | VRPR  | 1,609       | 0.34 (0.98)  | -1.58 - 2.27 | 0.726   | 505         | 0.02 (1.52)  | -2.96 - 2.99 | 0.990   | 2,114          | 0.23 (0.83)  | -1.39 - 1.86 |
|                  |       |             |              |              |         |             |              |              |         |                |              |              |
| CR1 rs3818361    | LMIR  | 1,638       | 0.14 (0.29)  | -0.43 - 0.7  | 0.633   | 506         | 0.94 (0.58)  | -0.21 - 2.09 | 0.109   | 2,156          | 0.39 (0.26)  | -0.13 - 0.91 |
|                  | LMDR  | 1,638       | 0.22 (0.32)  | -0.42 - 0.85 | 0.499   | 517         | 0.97 (0.64)  | -0.29 - 2.23 | 0.132   | 2,155          | 0.48 (0.3)   | -0.11 - 1.08 |
|                  | LMPR  | 1,638       | 0.57 (0.81)  | -1.01 - 2.16 | 0.478   | 517         | -0.03 (1)    | -1.99 - 1.94 | 0.977   | 2,155          | 0.51 (0.67)  | -0.81 - 1.82 |
|                  | VRIR  | 1,595       | 0.3 (0.26)   | -0.2 - 0.81  | 0.241   | 517         | -0.55 (0.4)  | -1.34 - 0.24 | 0.171   | 2,112          | 0.07 (0.22)  | -0.35 - 0.5  |
|                  | VRDR  | 1,594       | 0.33 (0.36)  | -0.37 - 1.03 | 0.360   | 517         | -0.22 (0.58) | -1.36 - 0.93 | 0.713   | 2,111          | 0.18 (0.31)  | -0.42 - 0.78 |
|                  | VRPR  | 1,594       | 0.39 (0.99)  | -1.55 - 2.32 | 0.695   | 517         | 0.46 (1.47)  | -2.43 - 3.34 | 0.757   | 2,111          | 0.39 (0.82)  | -1.23 - 2    |
|                  |       |             |              |              |         |             |              |              |         |                |              |              |
| CLU rs11136000   | LMIR  | 1,629       | 0.35 (0.23)  | -0.1 - 0.79  | 0.128   | 516         | -0.19 (0.5)  | -1.17 - 0.79 | 0.702   | 2,145          | 0.19 (0.22)  | -0.23 - 0.61 |
|                  | LMDR  | 1,629       | 0.56 (0.26)  | 0.06 - 1.06  | 0.028   | 515         | 0 (0.57)     | -1.12 - 1.12 | 0.996   | 2,144          | 0.38 (0.25)  | -0.11 - 0.86 |
|                  | LMPR  | 1,629       | 1 (0.64)     | -0.26 - 2.25 | 0.120   | 515         | 0.52 (0.89)  | -1.23 - 2.26 | 0.561   | 2,144          | 0.74 (0.55)  | -0.33 - 1.81 |
|                  | VRIR  | 1,586       | 0.02 (0.2)   | -0.37 - 0.42 | 0.906   | 515         | -0.46 (0.36) | -1.16 - 0.24 | 0.196   | 2,101          | -0.09 (0.18) | -0.43 - 0.26 |
|                  | VRDR  | 1,585       | 0.08 (0.28)  | -0.48 - 0.63 | 0.787   | 515         | -0.36 (0.52) | -1.37 - 0.66 | 0.491   | 2,100          | -0.02 (0.25) | -0.51 - 0.46 |
|                  | VRPR  | 1,585       | 0.39 (0.78)  | -1.14 - 1.92 | 0.616   | 515         | -0.18 (1.3)  | -2.74 - 2.37 | 0.888   | 2,100          | 0.23 (0.67)  | -1.08 - 1.54 |
|                  |       |             |              |              |         |             |              |              |         |                |              |              |
| PICALM rs3851179 | LMIR  | 1,623       | -0.07 (0.24) | -0.53 - 0.39 | 0.770   | 516         | 0.58 (0.5)   | -0.4 - 1.55  | 0.245   | 2,139          | 0.04 (0.22)  | -0.4 - 0.47  |
|                  | LMDR  | 1,623       | -0.32 (0.27) | -0.84 - 0.2  | 0.232   | 515         | 0.66 (0.57)  | -0.45 - 1.77 | 0.247   | 2,138          | -0.16 (0.25) | -0.66 - 0.34 |
|                  | LMPR  | 1,623       | -1.22 (0.67) | -2.52 - 0.08 | 0.067   | 515         | 0.46 (0.88)  | -1.27 - 2.2  | 0.599   | 2,138          | -0.93 (0.56) | -2.03 - 0.18 |
|                  | VRIR  | 1,580       | -0.15 (0.21) | -0.56 - 0.27 | 0.490   | 515         | 0.43 (0.35)  | -0.27 - 1.12 | 0.227   | 2,095          | -0.01 (0.18) | -0.37 - 0.34 |
|                  | VRDR  | 1,579       | -0.17 (0.3)  | -0.75 - 0.41 | 0.566   | 515         | 0.53 (0.52)  | -0.48 - 1.54 | 0.305   | 2,094          | 0 (0.26)     | -0.5 - 0.51  |
|                  | VRPR  | 1,579       | -0.24 (0.81) | -1.84 - 1.35 | 0.764   | 515         | 0.75 (1.3)   | -1.79 - 3.29 | 0.562   | 2,094          | 0.03 (0.69)  | -1.32 - 1.39 |

**Supplementary Table 6. Association between *CLU*, *CR1* and *PICALM* loci variants and memory endophenotypes in non-demented control subjects two Caucasian series.** The analyses were done for the individual RS and JS control subjects separately, as well as jointly, where series was included as a covariate. The analyses and other descriptions are otherwise the same as Table 2.



|                |
|----------------|
|                |
| <b>P-value</b> |
| 0.191          |
| <b>0.097</b>   |
| 0.371          |
| 0.696          |
| 0.712          |
| 0.781          |

|       |
|-------|
| 0.143 |
| 0.113 |
| 0.449 |
| 0.742 |
| 0.556 |
| 0.640 |

|       |
|-------|
| 0.382 |
| 0.129 |
| 0.174 |
| 0.623 |
| 0.920 |
| 0.731 |

|              |
|--------------|
| 0.873        |
| 0.533        |
| <b>0.100</b> |
| 0.946        |
| 0.985        |
| 0.963        |

jects from  
covariate.
